# Supplementary material
Source: PubMed Central journal article supplement (PMC3538320)
Supplement: mt2012245x3.pdf [file mt2012245x3.pdf]

**A**

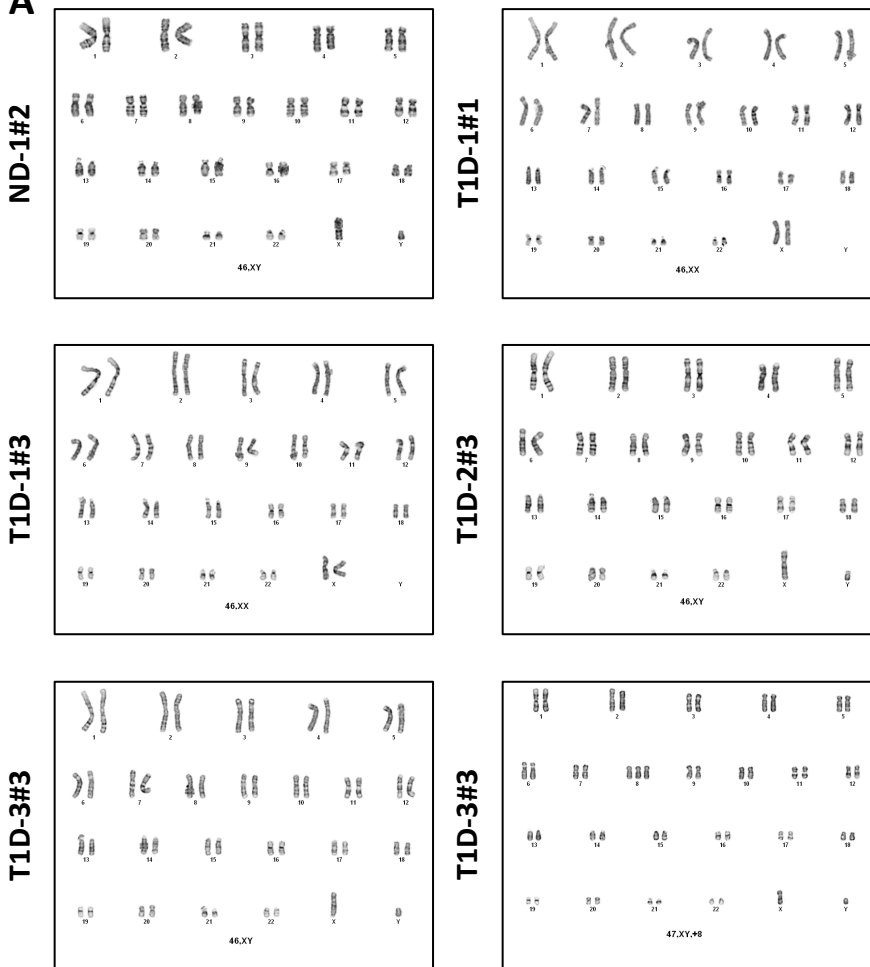

**B**

| iPS Clone | Passage number | Karyotype     | Description         |
|-----------|----------------|---------------|---------------------|
| ND -1#2   | 23             | 46, XY        | Normal              |
| T1D -1#1  | 34             | 46, XX        | Normal              |
| T1D -1#2  | 23             | 46, XX        | Normal              |
| T1D -1#3  | 26             | 46, XX        | Normal              |
| T1D -2#3  | 27             | 46, XY        | Normal              |
| T1D -3#3  | 27             | 47, XY, +8[1] | Normal, 1 trisomy 8 |
