# Supplementary material
Source: PubMed Central journal article supplement (PMC3538320)
Supplement: mt2012245x11.pdf [file mt2012245x11.pdf]

**Supplementary Table 1.** Antibodies used in this study

| <b>Primary Antibody</b>   | <b>Company/Catlog No.</b>          | <b>Secondary Antibody</b> |
|---------------------------|------------------------------------|---------------------------|
| SSEA1                     | Millipore SCR001                   | #715-095-151 <sup>a</sup> |
| SSEA4                     | Millipore SCR001                   | #715-095-151 <sup>a</sup> |
| TRA-1-60                  | Millipore SCR001                   | #715-095-151 <sup>a</sup> |
| TRA-1-81                  | Millipore SCR001                   | #715-095-151 <sup>a</sup> |
| OCT3/4                    | Cell signaling Technology #2750    | #711-095-152 <sup>a</sup> |
| SOX2                      | Cell Signaling Technology #2748    | #711-095-152 <sup>a</sup> |
| KLF4                      | Abcam #ab26648                     | #711-095-152 <sup>a</sup> |
| NANOG                     | Abcam #ab21624                     | #711-095-152 <sup>a</sup> |
| Beta III tubulin          | Abcam #41489                       | #703-095-155 <sup>a</sup> |
| CD31                      | Santa Cruz Biotechnology #SC1506   | #705-095-003 <sup>a</sup> |
| SOX17                     | R&D Systems #MAB1924               | #715-095-151 <sup>a</sup> |
| HNF3 beta/ FOXA2          | Millipore #07-633                  | #711-095-152 <sup>a</sup> |
| HNF 4A                    | Santa Cruz Biotechnology #sc-8987  | #711-095-152 <sup>a</sup> |
| HNF1B                     | Santa Cruz Biotechnology #sc-7411  | #705-095-003 <sup>a</sup> |
| HNF6                      | Santa Cruz Biotechnology #sc-13050 | #711-095-152 <sup>a</sup> |
| PDX1                      | Santa Cruz Biotechnology #sc-25403 | #711-075-152 <sup>a</sup> |
| Insulin                   | Sigma #I2018                       | #715-095-151 <sup>a</sup> |
| C-peptide                 | Cell Signaling Technology #4593    | #711-075-152 <sup>a</sup> |
| Insulin                   | Cell Signaling Technology #4590    | #711-095-152 <sup>a</sup> |
| proinsulin /C-peptide     | Millipore #CBL94                   | #715-075-151 <sup>a</sup> |
| Glucagon                  | Abcam #ab10988                     | #715-075-151 <sup>a</sup> |
| Somatostatin              | Dako #A0566                        | #711-075-152 <sup>a</sup> |
| <b>Flow Cytometry</b>     |                                    |                           |
| SOX17                     | R&D Systems #MAB1924               | #A11029 <sup>b</sup>      |
| IgG3 Isotype Control      | R&D Systems #MAB007                | #A11029 <sup>b</sup>      |
| Insulin                   | Dako Cytomation #A0564             | #706-176-148 <sup>a</sup> |
| OCT4                      | Millipore #FCMAB113A4              |                           |
| IgG1 Isotype Control      | R&D Systems #IC002G                |                           |
| CD184 (CXCR4)             | BD Pharmingen #55976               |                           |
| IgG2a, K, Isotype Control | BD Pharmingen #555576              |                           |

<sup>a</sup>Jackson Laboratories, <sup>b</sup>Invitrogen
