# Supplementary material
Source: PubMed Central journal article supplement (PMC3538320)
Supplement: mt2012245x12.pdf [file mt2012245x12.pdf]

**Supplementary Table 2.** Primers for characterization of human iPS cells

| <b>Gene</b> | <b>Forward Sequence</b>    | <b>Reverse Sequence</b>    | <b>Accession</b> |
|-------------|----------------------------|----------------------------|------------------|
| OCT4        | AGCGAACCAGTATCGAGAAC       | TTACAGAACCACACTCGGAC       | BC117435.1       |
| SOX2        | AGCTACAGCATGATGCAGGA       | GGTCATGGAGTTGTACTGCA       | BC013923.2       |
| NANOG       | TGAACCTCAGCTACAAACAG       | TGGTGGTAGGAAGAGTAAAG       | AB093576.1       |
| c-MYC       | ACTCTGAGGAGGAACAAGAA       | TGGAGACGTGGCACCTCTT        | BC000141         |
| KLF4        | TCTCAAGGCACACCTGCGAA       | TAGTGCCTGGTCAGTTCATC       | BC029923.1       |
| hTERT       | TGTGCACCAACATCTACAAG       | GCGTTCTTGGCTTTCAGGAT       | AB085628.1       |
| GDF3        | AAATGTTTGTGTTGCGGTCA       | TCTGGCACAGGTGTCTTCAG       | AF263538.1       |
| GAPDH       | AGC CAC ATC GCT CAG ACA CC | GTA CTC AGC GGC CAG CAT CG | BT006893.1       |
