# Supplementary material
Source: PubMed Central journal article supplement (PMC3538320)
Supplement: mt2012245x13.pdf [file mt2012245x13.pdf]

**Supplementary Table 3.** Primers and probes used in this study.

| <b>GENE</b> | <b>PROBE</b> | <b>LEFT PRIMER</b>       | <b>RIGHT PRIMER</b>    |
|-------------|--------------|--------------------------|------------------------|
| SOX17       | 61           | ACGCCGAGTTGAGCAAGA       | TCTGCCTCCTCCACGAAG     |
| FOXA2       | 68           | CGTTCGGGTCTGAACTG        | ACCGCTCCCAGCATACTTT    |
| HNF4A       | 27           | AGCAACGGACAGATGTGTGA     | TCAGACCCTGAGCCACCT     |
| HB9         | 60           | TGCCTAAGATGCCCCGACTT     | AGCTGCTGGCTGGTGAAG     |
| HNF6        | 88           | CCTGGAGCAAACCTCAAATCC    | TTCTTTCCTTTTGCATGCTG   |
| NKX6.1      | 69           | CGTTGGGGATGACAGAGAGT     | CGAGTCCTGCTTCTTCTGG    |
| ISL1        | 66           | AAGGACAAGAAGCGAAGCAT     | TTCCTGTCATCCCCTGGATA   |
| NEUROD1     | 30           | CTGCTCAGGACCTACTAACAACAA | GTCCAGCTTGGAGGACCTT    |
| MAFA        | 39           | AGCGAGAAGTGCCAACTCC      | TTGTACAGGTCCCCTCTTT    |
| GLUT2       | 85           | GCATGTGCCACACTCACAC      | AAAACCAGGGTCCCAGTGA    |
| SST         | 38           | ACCCAGACTCCGTCACTTT      | ACAGCAGCTCTGCCAAGAAG   |
| GCG         | 82           | GTACAAGGCAGCTGGCAAC      | TGGGAAGCTGAGAATGATCTG  |
| NEUROG      | 60           | TTTTGCGCCGGTAGAAAG       | GGCAGGTCACCTTCGTCTT    |
| INS         | 28           | AGAAGAGGCCATCAAGCAGA     | CAGGTGTTGGTTCACAAAGG   |
| PDX1        | 78           | AAGCTCACGCGTGGAAAG       | GCCGTGAGATGTACTTGTGAA  |
| NANOG       | 31           | AGATGCCTCACACGGAGACT     | TTTGCGACACTCTTCTCTGC   |
| OCT4        | 35           | AGCAAAACCCGGAGGAGT       | CCACATCGGCCTGTGTATATC  |
| c-MYC       | 34           | CACCAGCAGCGACTCTGA       | GATCCAGACTCTGACCTTTTGC |
| SOX2        | 35           | TGCTGCCTCTTTAAGACTAGGAC  | CCTGGGGCTCAAACCTTCTCT  |
| KLF4        | 52           | GGGAGAAGACACTGCGTCA      | GGAAGCACTGGGGGAAGT     |
| GAPDH       | 60           | AGCCACATCGCTCAGACAC      | GCCCAATACGACCAAATCC    |
