# Supplementary material
Source: PubMed Central journal article supplement (PMC3538320)
Supplement: mt2012245x14.pdf [file mt2012245x14.pdf]

**Supplementary Table 4.** Primers and probes used to detect the exogenous genes.

| <b>GENE</b>  | <b>Forward Sequence</b>           | <b>Reverse Sequence</b>               | <b>PROBE</b>                             |
|--------------|-----------------------------------|---------------------------------------|------------------------------------------|
| <b>SOX2</b>  | <b>CCAGCACTACCAGAGCG</b>          | <b>TGTAATCCAGAGGTTGATTAT<br/>CGAT</b> | <b>CCCGGCACGGCCATTAACG</b>               |
| <b>KLF4</b>  | <b>ACCGAGCATTTCCAGGT<br/>C</b>    | <b>CAGCTGCCTTGTAAGTCATTG</b>          | <b>CGGACCACCTCGCCTTACACAT</b>            |
| <b>c-MYC</b> | <b>TTACGCTATGTGGATACG<br/>CTG</b> | <b>TCATAAAGAGACAGCAACCA<br/>GG</b>    | <b>AGGAGAAAATGAAAGCCATACGG<br/>GAAGC</b> |
