# Supplementary material
Source: PubMed Central journal article supplement (PMC3538320)

Supporting Figure 1 Thatava *et al.*

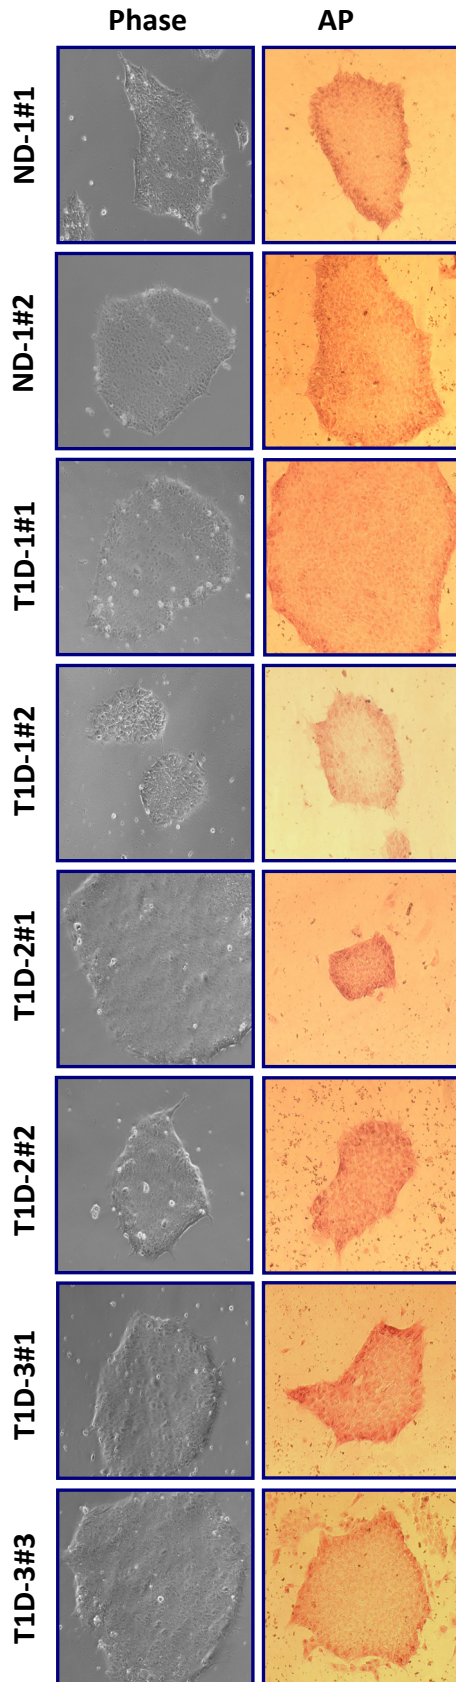

Supplement: mt2012245x1.pdf [file mt2012245x1.pdf]

Supporting Figure 10

Thatava *et al.*

**A**

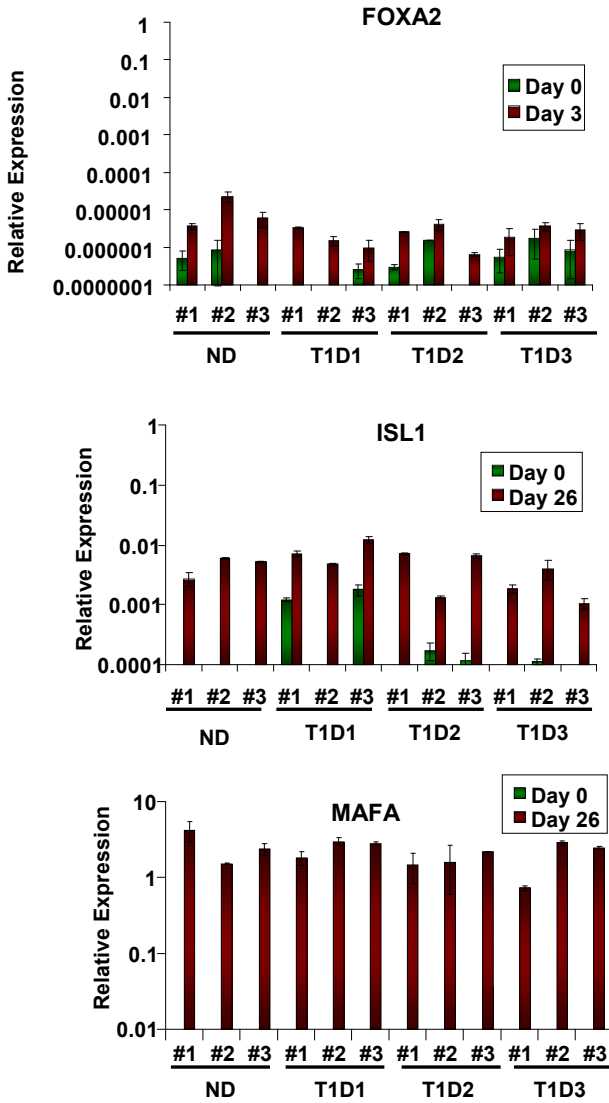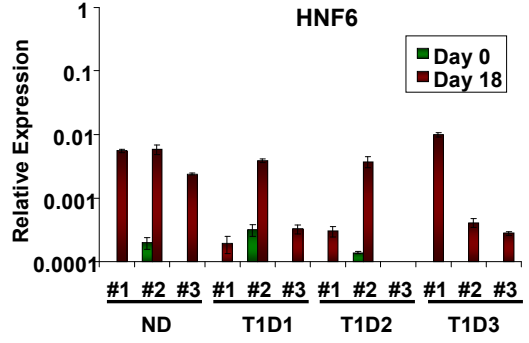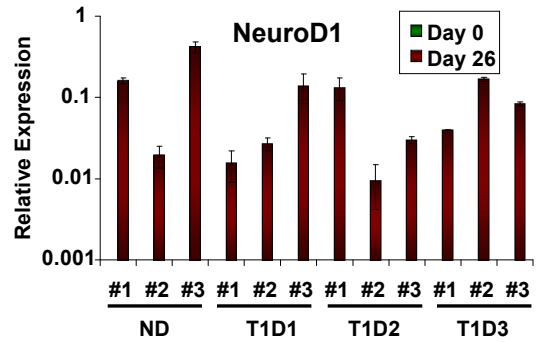

**B Undifferentiated cells (Day 0)**

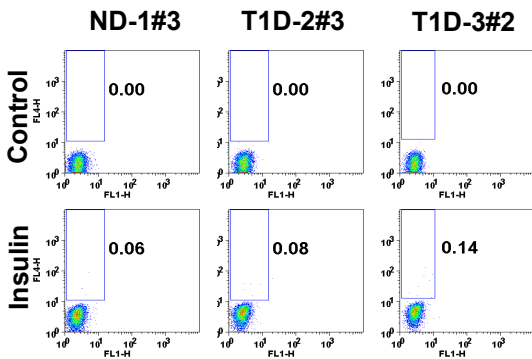

**C Differentiated cells (Day 26)**

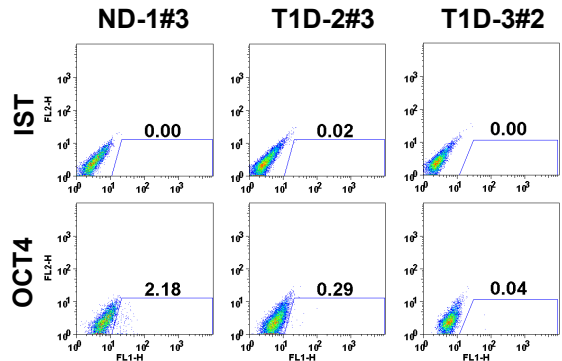

Supplement: mt2012245x10.pdf [file mt2012245x10.pdf]

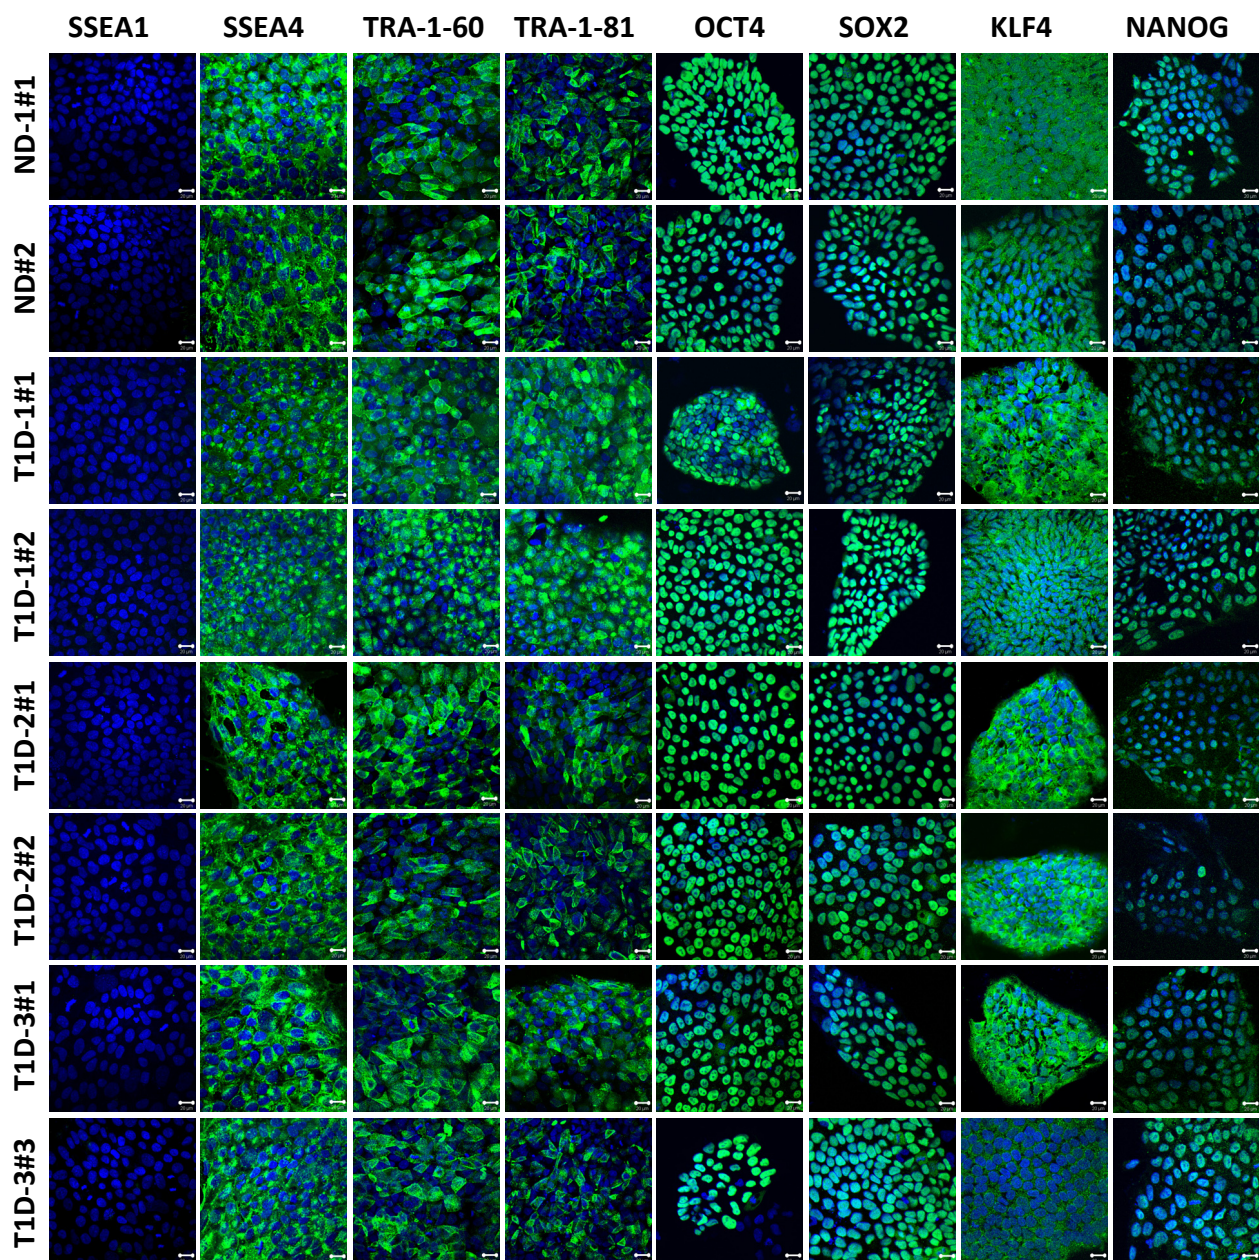

Supplement: mt2012245x2.pdf [file mt2012245x2.pdf]

Supporting Figure 4

Thatava *et al.*

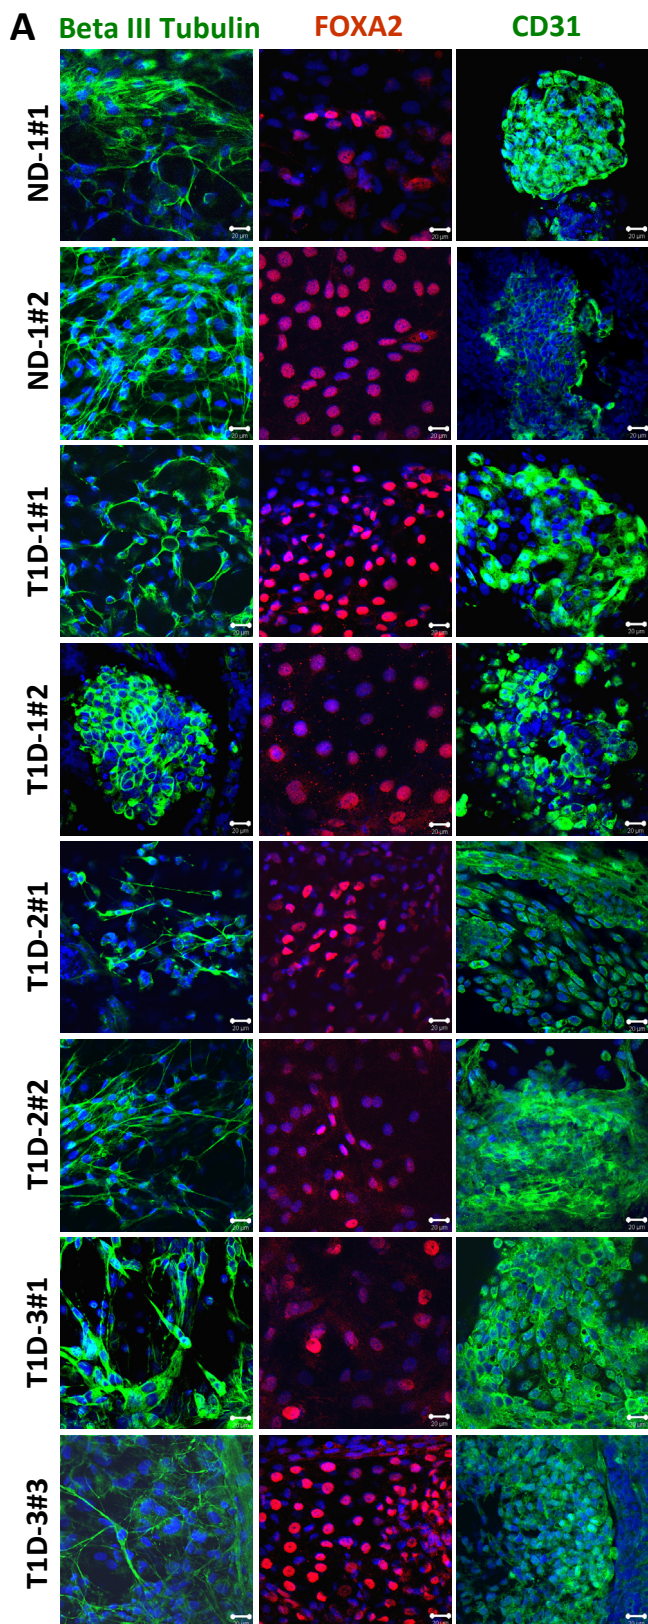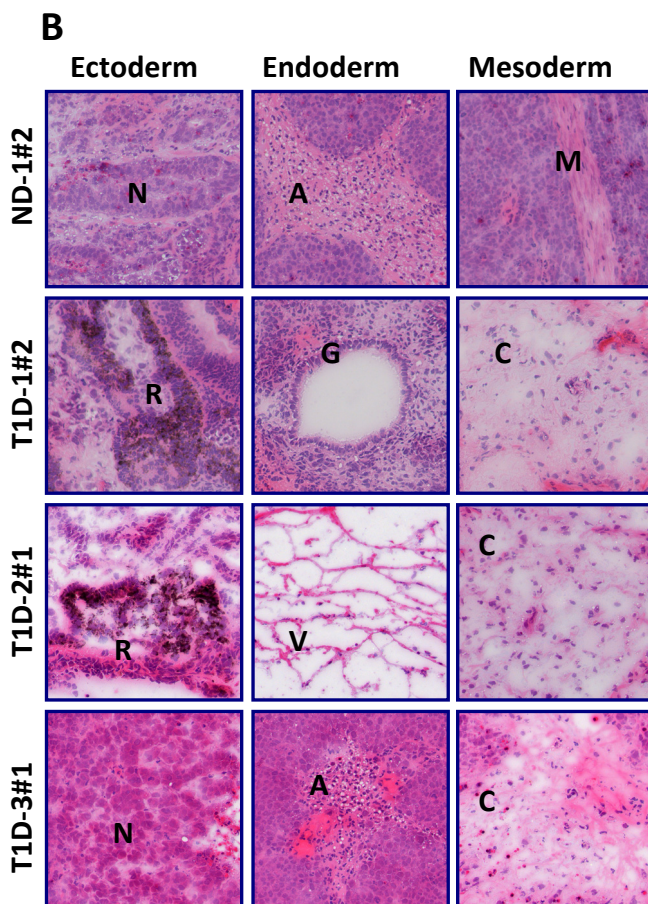

Supplement: mt2012245x4.pdf [file mt2012245x4.pdf]

Supporting Figure 5      Thatava *et al.*

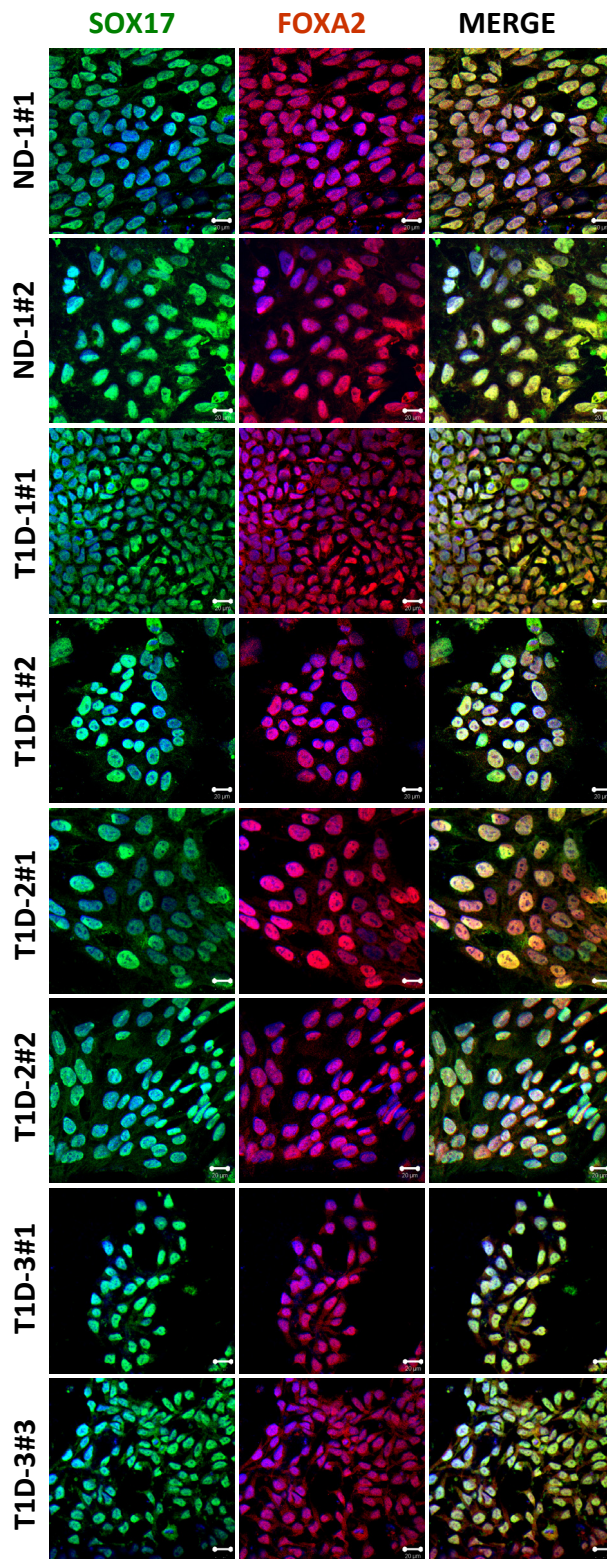

Supplement: mt2012245x5.pdf [file mt2012245x5.pdf]

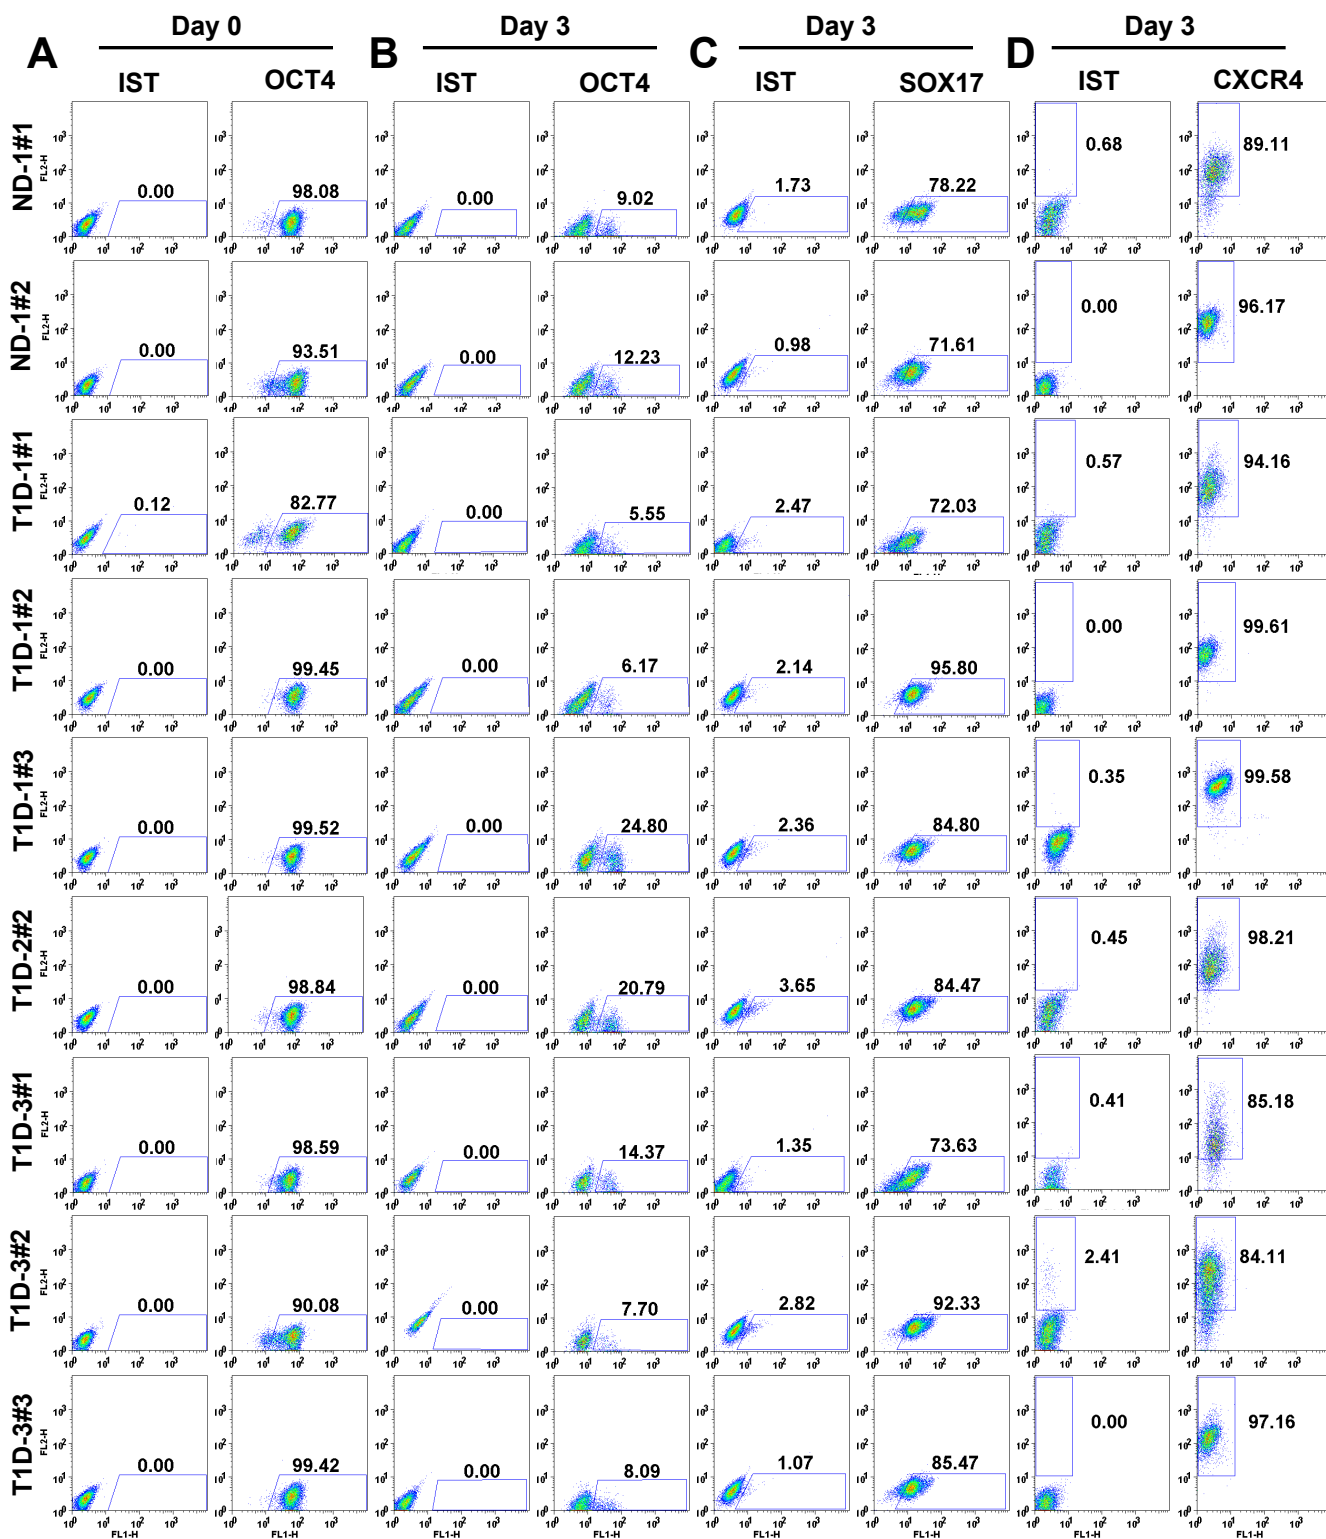

Supplement: mt2012245x6.pdf [file mt2012245x6.pdf]

Supporting Figure 7      Thatava *et al.*

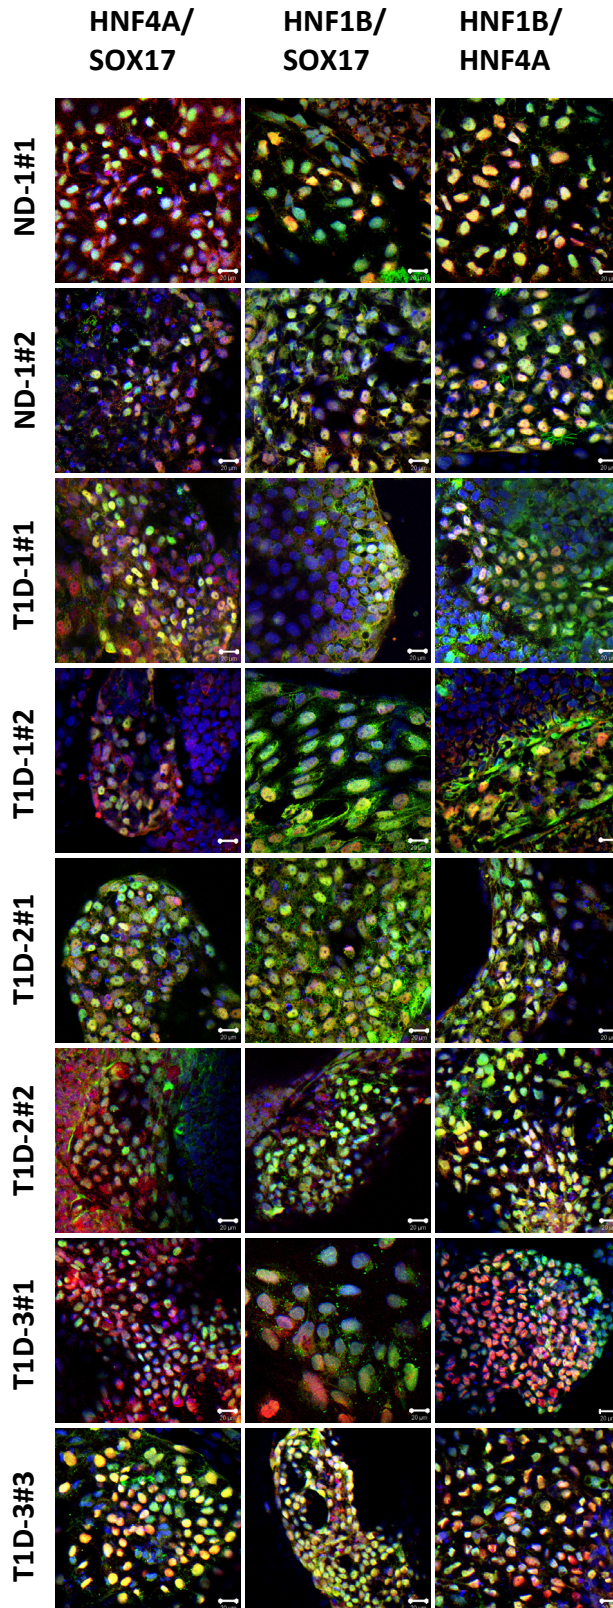

Supplement: mt2012245x7.pdf [file mt2012245x7.pdf]

Supporting Figure 8

Thatava *et al.*

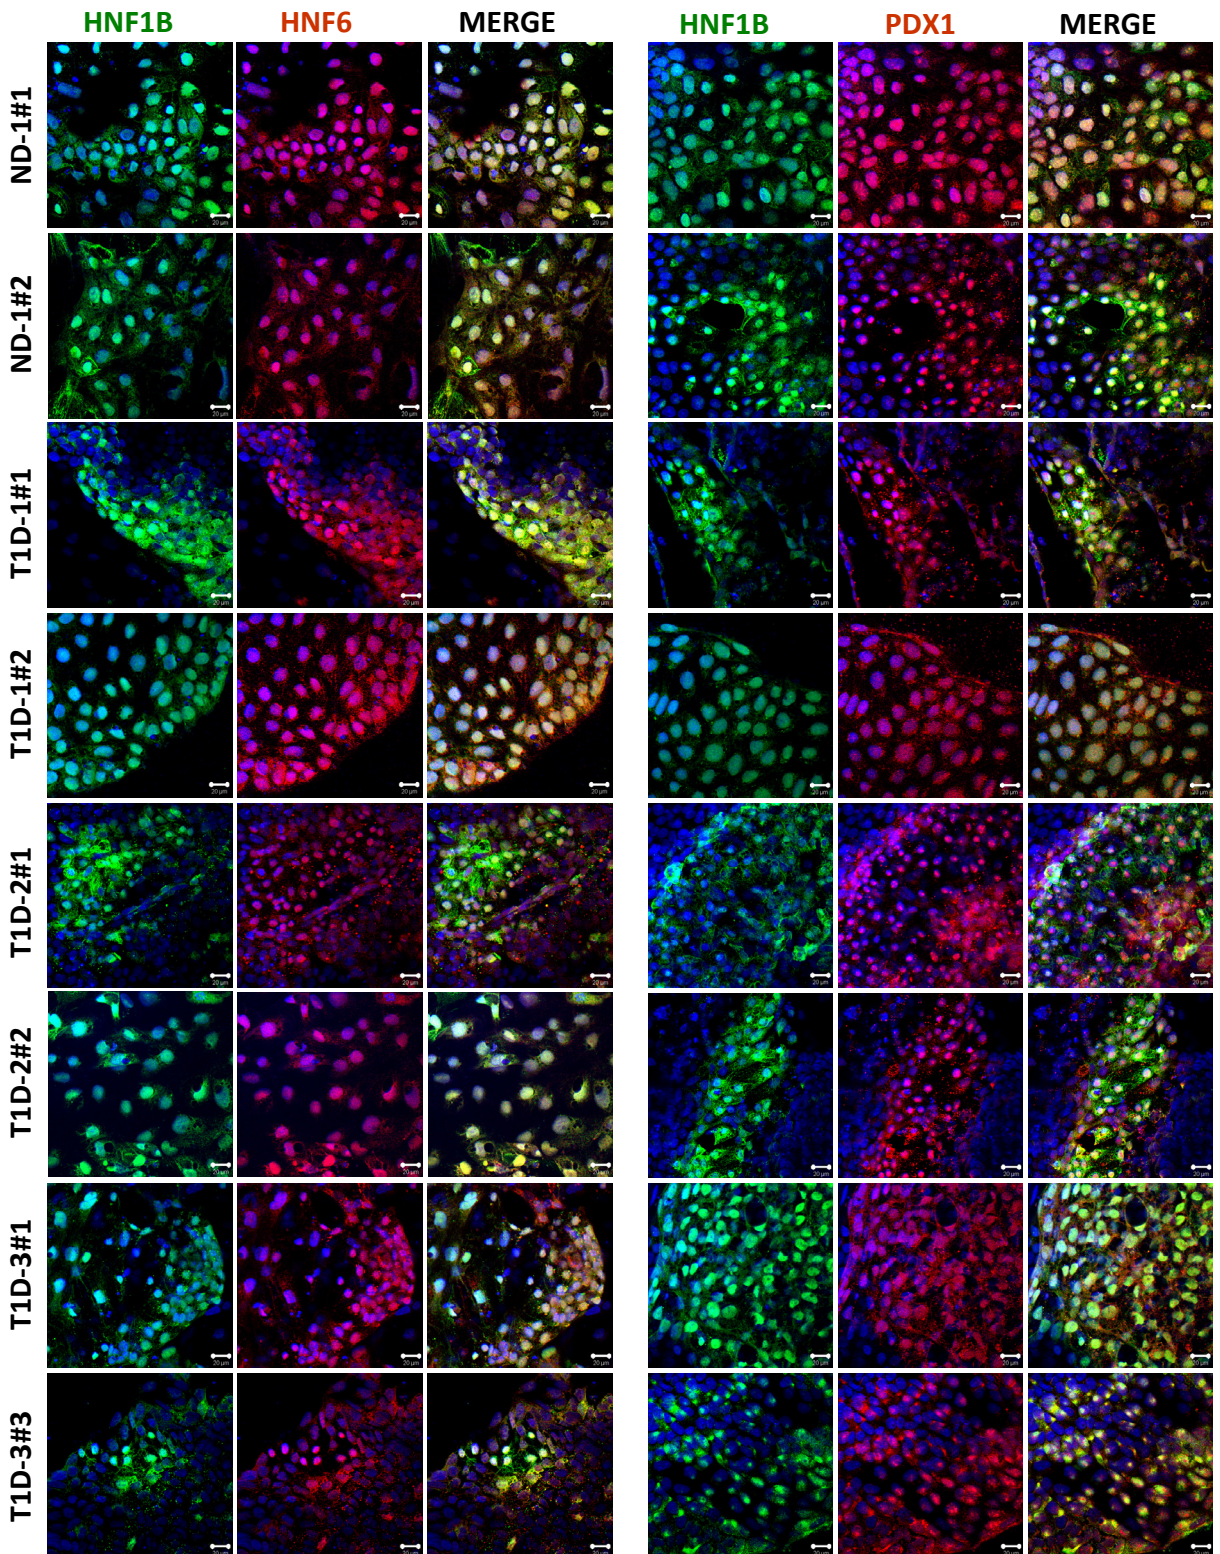

Supplement: mt2012245x8.pdf [file mt2012245x8.pdf]

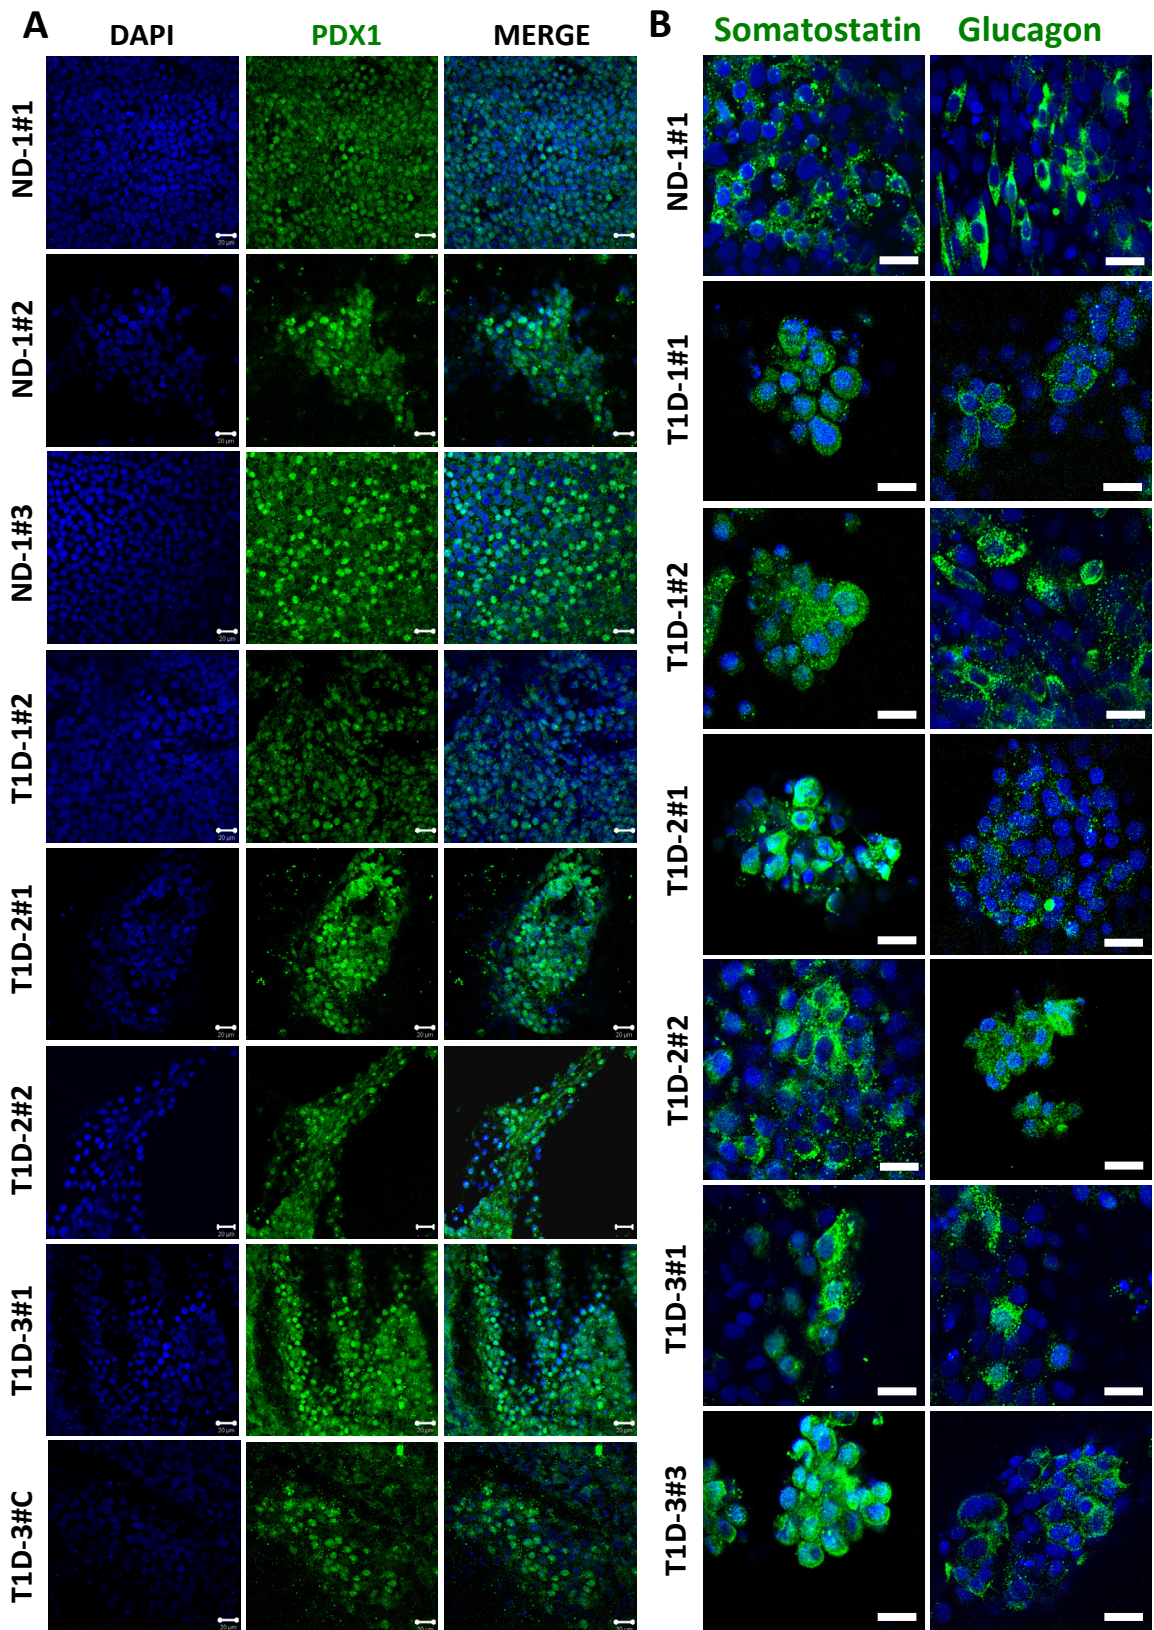

Supplement: mt2012245x9.pdf [file mt2012245x9.pdf]
